# Supplementary material for: A proximity biotinylation-based approach to identify protein-E3 ligase interactions induced by PROTACs and molecular glues
Source: PubMed Central journal article supplement (PMC8748630; doi:10.1038/s41467-021-27818-z), 2022-01-10
Supplement: 41467_2021_27818_MOESM1_ESM.pdf [file 41467_2021_27818_MOESM1_ESM.pdf]

Supplementary Information:

**A proximity biotinylation-based approach to identify protein-E3  
ligase interactions induced by PROTACs and molecular glues**

Satoshi Yamanaka<sup>1</sup>, Yuto Horiuchi<sup>1</sup>, Saya Matsuoka<sup>1</sup>, Kohki Kido<sup>1</sup>, Kohei Nishino<sup>2</sup>,  
Mayaka Maeno<sup>3</sup>, Norio Shibata<sup>3</sup>, Hidetaka Kosako<sup>2</sup>, Tatsuya Sawasaki<sup>1\*</sup>

*<sup>1</sup>Division of Cell-Free Sciences, Proteo-Science Center, Ehime University, Matsuyama,  
790-8577 Japan, <sup>2</sup>Division of Cell Signaling, Fujii Memorial Institute of Medical  
Sciences, Tokushima University, Tokushima 770-8503, Japan, <sup>3</sup>Department of  
Nanopharmaceutical Sciences, Nagoya Institute of Technology, Nagoya, 466-8555,  
Japan.*

\*Corresponding Author:

Tatsuya Sawasaki  
Proteo-Science Center,  
Ehime University, Matsuyama 790-8577, Japan  
Tel: 81-89-927-8530  
Fax: 81-89-927-9941  
E-mail address: sawasaki@ehime-u.ac.jp.

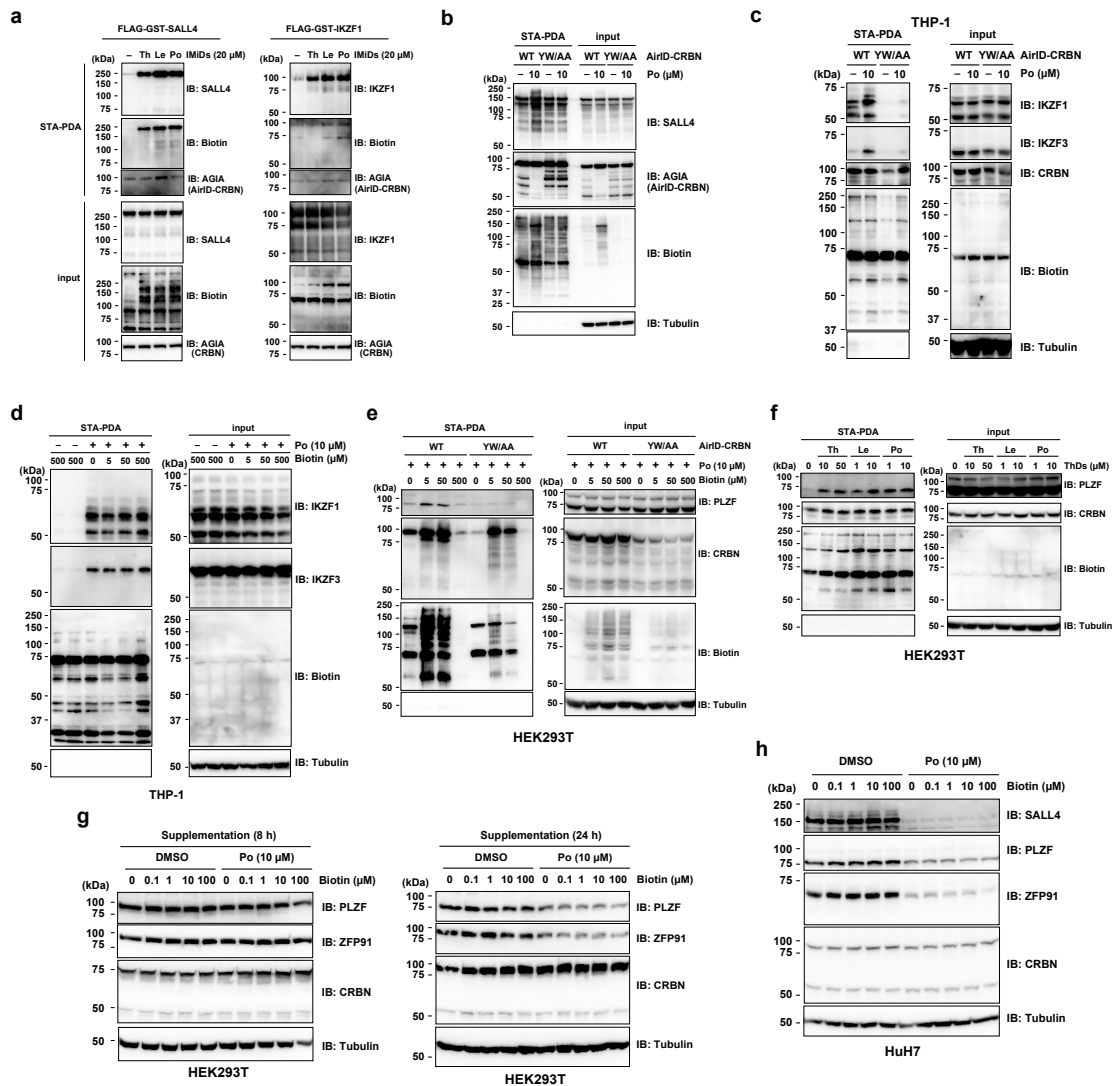

**Supplementary Fig. 1. Optimization of thalidomide and its derivatives (IMiDs)-dependent neo-substrate biotinylation.** **a**, *In vitro* IMiD-dependent biotinylation assay of neo-substrates by AirID-CRBN. Biotinylation of FLAG-GST-SALL4 or -IKZF1 by AirID-CRBN was performed in the presence of DMSO, thalidomide (Th), lenalidomide (Le) or pomalidomide (Po) at 26 °C for 3 h. **b**, IMiD-dependent biotinylation assay of exogenous neo-substrates by AirID-CRBN in cells. HEK293T cells were transfected with AGIA-AirID-CRBN-WT or -YW/AA and Myc-SALL4 and treated with DMSO or 10 μM pomalidomide (Po) and 10 μM biotin and 5 μM MG132 for 6 h. **c**, IMiD-dependent biotinylation assay of endogenous neo-substrate by AirID-CRBN in THP-1 cells. THP-1 cells stably expressing AGIA-AirID-CRBN-WT or -YW/AA were treated with DMSO or 10 μM pomalidomide (Po) in the presence of 10 μM biotin and 5 μM MG132 for 8 h. **d**, Biotin dose-dependent biotinylation assay of endogenous neo-substrates by AirID-CRBN in THP-1 cells. THP-1 cells stably expressing AGIA-AirID-CRBN-WT were treated with DMSO or 10 μM pomalidomide (Po) in the presence of 0, 5, 50 or 500 μM biotin and 5 μM MG132 for 8 h. **e**, Biotin dose-dependent biotinylation assay of endogenous neo-substrate by AirID-CRBN in HEK293T cells. HEK293T cells stably expressing AGIA-AirID-CRBN-WT or -YW/AA were treated with DMSO or 10 μM pomalidomide (Po) in the presence of 0, 5, 50 or 500 μM biotin and 5 μM MG132 for 8 h. **f**, IMiD dose-dependent biotinylation assay of endogenous neo-substrates by AirID-CRBN in HEK293T cells. HEK293T cells stably expressing AGIA-AirID-CRBN-WT were treated with DMSO, thalidomide (Th), lenalidomide (Le) or pomalidomide (Po) in the presence of 10 μM biotin and 5 μM MG132 for 8 h. **g**, Immunoblot analysis of neo-substrates protein levels in HEK293T cells treated with DMSO or

pomalidomide (Po) in the presence of biotin for 8 h or 24 h. **h**, Immunoblot analysis of neo-substrate protein levels in HEK293T cells treated with DMSO or pomalidomide (Po) in the presence of biotin for 8 h. **a–f**, Biotinylated proteins were pulled down using streptavidin beads and analysed by immunoblotting. All experiments were repeated twice independently with similar results. Source data are provided as a Source data file.

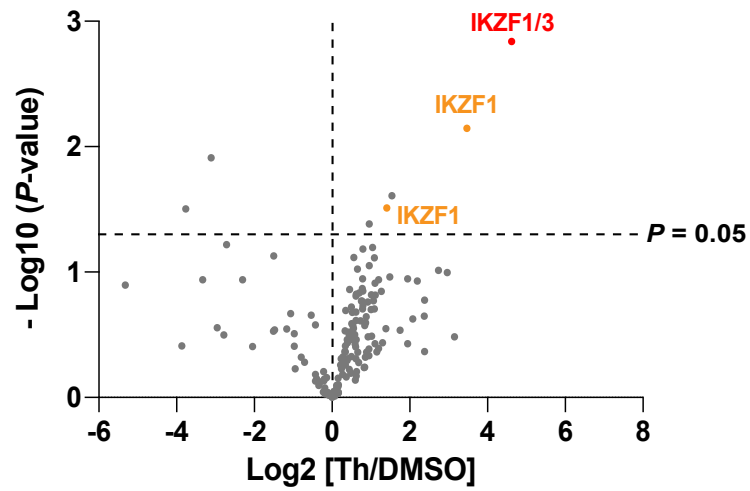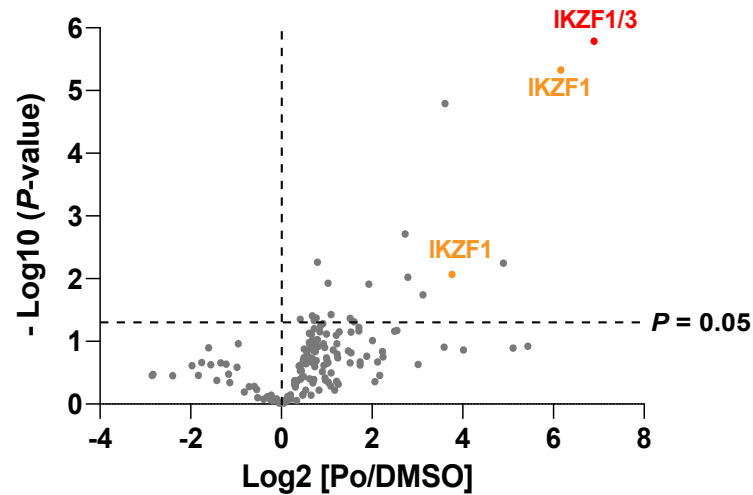

**Supplementary Fig. 2. LC-MS/MS analysis of biotinylated peptides using AirID-CRBN in THP-1 cells.** THP-1 cells stably expressing AGIA-AirID-CRBN-WT were treated with DMSO, 20  $\mu$ M thalidomide (Th) or 10  $\mu$ M pomalidomide (Po) in the presence of 10  $\mu$ M biotin and 5  $\mu$ M MG132 for 8 h (biological replicates;  $n = 3$ ). Then, the biotinylated peptides were enriched with tamavidin 2-REV followed by LC-MS/MS analysis. Significant changes in the volcano plots were calculated by Student's two-sided  $t$ -test, and the false discovery rate (FDR)-adjusted  $P$ -values calculated using Benjamini-Hochberg method are shown in the Supplementary Data 1.

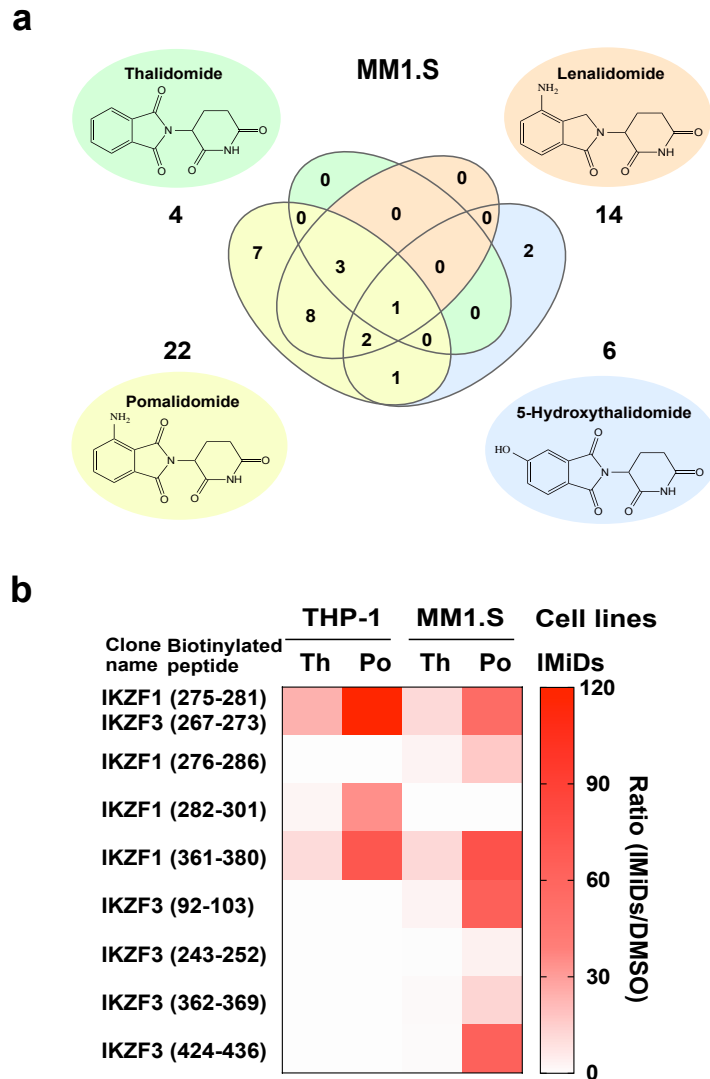

**Supplementary Fig. 3. Comparison of thalidomide and its derivatives (IMiDs)-inducible biotinylation from LC-MS/MS analysis in THP-1 and MM1.S cells. a,** Comparison of biotinylated peptides among IMiDs detected by LC-MS/MS analysis. Overlapping IMiD-dependent biotinylated peptides (IMiD/DMSO ratio > 5) in MM1.S cells were compared among IMiDs using a Venn diagram. **b,** Comparison of biotinylated peptides of IKZF1 or IKZF3 (IMiD/DMSO ratio > 5 and  $P$ -value < 0.05) between THP1 cells and MM1.S cells on a heat map. Significant changes in the heatmap were calculated by Student's two-sided  $t$ -test and the false discovery rate (FDR)-adjusted  $P$ -values calculated using Benjamini-Hochberg method are shown in the Supplementary Data 1, 5. Source data are provided as a Source data file.

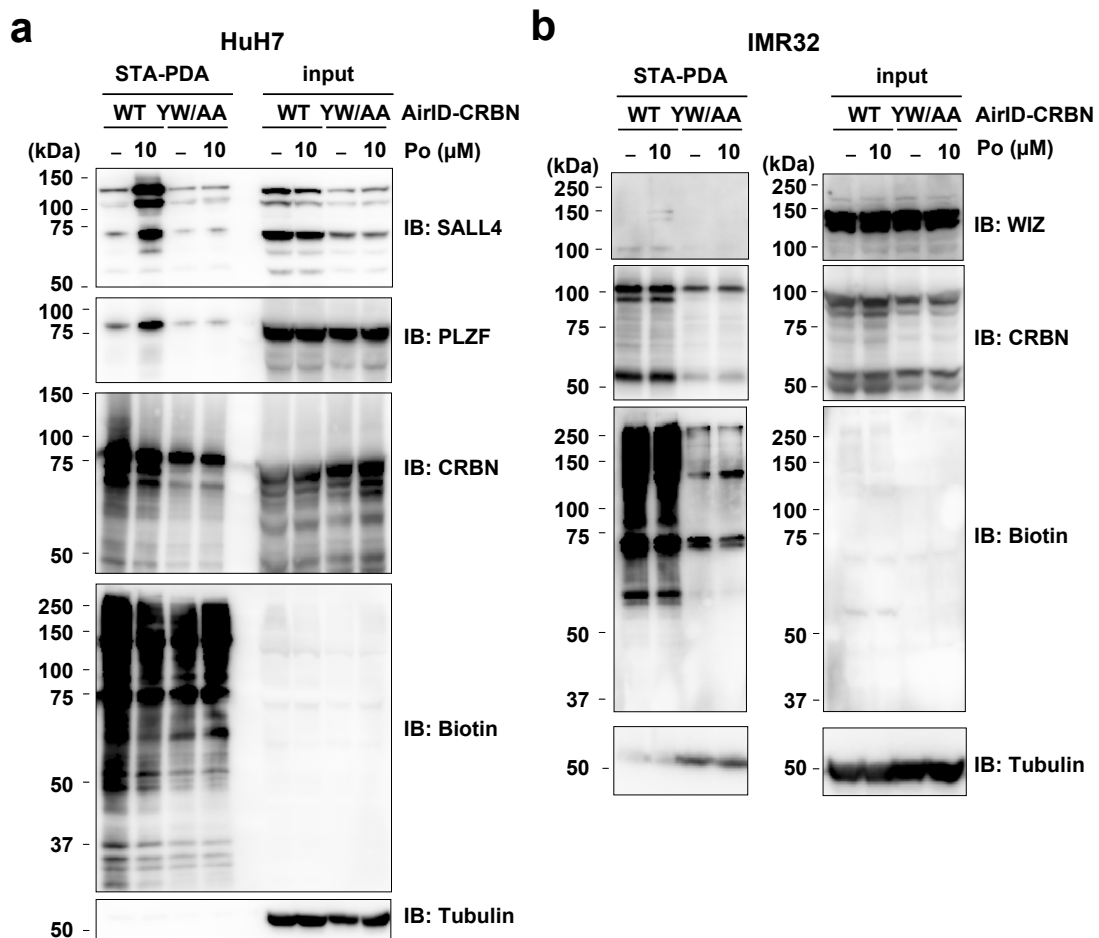

**Supplementary Fig. 4. Streptavidin pull-down assays in HuH7 and IMR32 cells expressing AirID-CRBN wild type or AirID-CRBN mutant. a-b,** Thalidomide and its derivatives (IMiDs)-dependent biotinylation assay of known neo-substrates via STA-PD assay. **(a)** HuH7 or **(b)** IMR32 cells stably expressing AGIA-AirID-CRBN-WT or -YW/AA were treated with DMSO or 10 μM pomalidomide (Po) in the presence of 10 μM biotin and 5 μM MG132 for 8 h. Then, the biotinylated proteins were pulled down using streptavidin beads and analysed by immunoblotting. The experiments were repeated three times independently with similar results. Source data are provided as a Source data file.

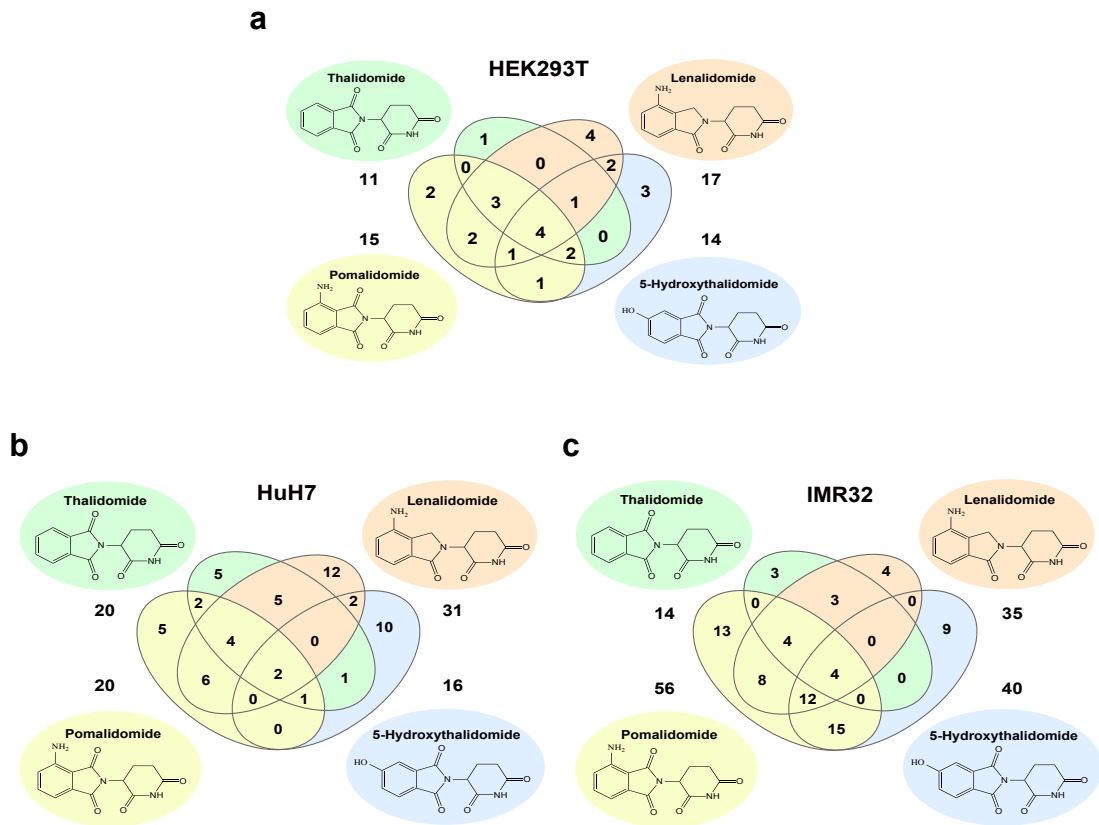

**Supplementary Fig. 5. Comparison of LC-MS/MS analyses from HEK293T, HuH7, or IMR32 cells with thalidomide and its derivatives (IMiDs).** **a**, Comparison of biotinylated peptides among IMiDs detected by LC-MS/MS analysis using HEK293T cells. Overlapping IMiD-dependent biotinylated peptides (IMiD/DMSO ratio > 5) were compared among IMiDs using a Venn diagram. **b-c**, Comparison of biotinylated peptides among IMiDs detected by LC-MS/MS analysis using **(b)** HuH7 or **(c)** IMR32 cells. Overlapping IMiD-dependent biotinylated peptides (IMiD/DMSO ratio > 5) were compared among IMiDs using a Venn diagram.

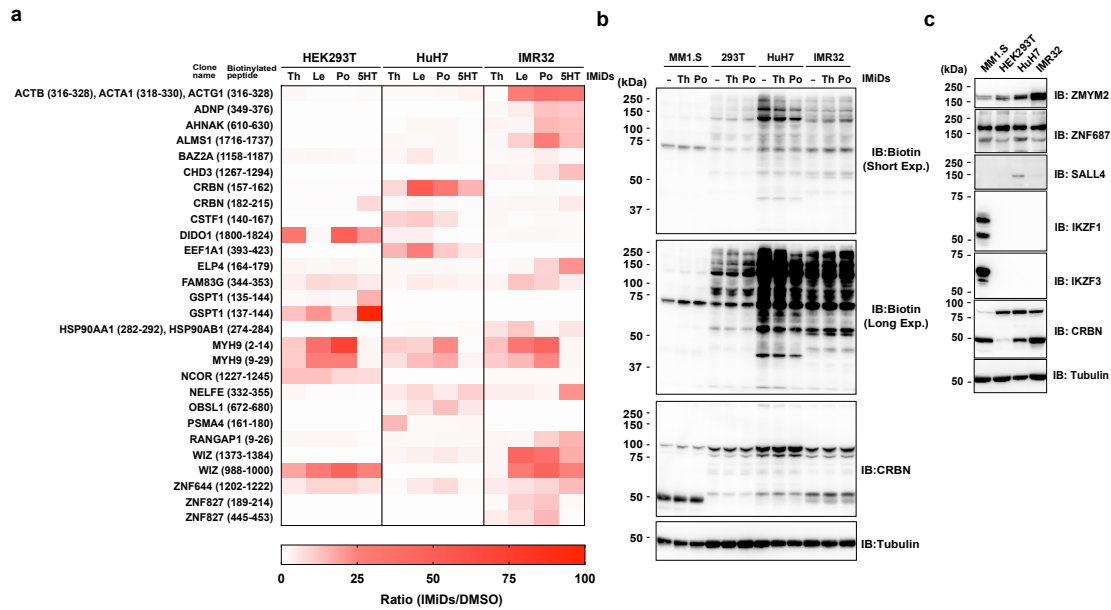

**Supplementary Fig. 6. Comparison of thalidomide and its derivatives (IMiDs)-inducible biotinylated peptides by AirID-CRBN among cell lines. a,** Comparison of biotinylated peptides (IMiD/DMSO ratio > 10 and  $P$ -value < 0.05) among HEK293T, HuH7, and IMR32 cells on a heatmap. Significant changes in the heatmap were calculated by Student's two-sided  $t$ -test and the false discovery rate (FDR)-adjusted  $P$ -values calculated using Benjamini-Hochberg method are shown in the Supplementary Data 6–8. **b,** Biotinylated peptides among MM1.S, HEK293T, HuH7, and IMR32 cells treated with DMSO, 10  $\mu$ M thalidomide (Th) or 10  $\mu$ M pomalidomide (Po) in the presence of 10  $\mu$ M biotin and 5  $\mu$ M MG132 were compared by immunoblot analysis. The experiment was repeated three times independently with similar results. **c,** Protein-expression levels of neo-substrates among MM1.S, HEK293T, HuH7 and IMR32 cells were compared by immunoblotting. The experiment was repeated three times independently with similar results. Source data are provided as a Source data file.



**a**

|               | MM1.S | 293T | HuH7 | IMR32 |
|---------------|-------|------|------|-------|
| <b>CUL4A</b>  | ○     | ○    | ○    | ○     |
| <b>CUL4B</b>  | ×     | ○    | ○    | ○     |
| <b>DDB1</b>   | ○     | ×    | ○    | ○     |
| <b>RBX1</b>   | ×     | ×    | ×    | ×     |
| <b>UBC12</b>  | ×     | ○    | ○    | ○     |
| <b>CSN</b>    | ○     | ○    | ○    | ○     |
| <b>UBE2D3</b> | ×     | ×    | ×    | ×     |
| <b>UBE2G1</b> | ×     | ×    | ×    | ×     |

**b**

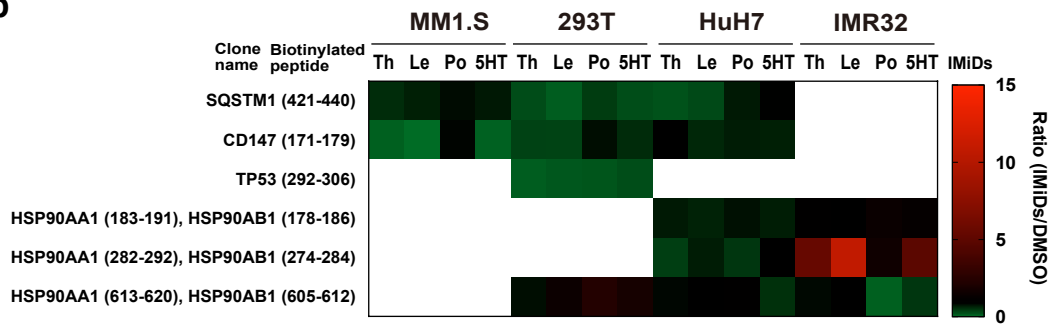

**Supplementary Fig. 7. Table and heatmap of known proteins involved in CRL4<sup>CRBN</sup> and proteins known to interact with CRBN.** **a**, Table of known proteins involved in CRL4<sup>CRBN</sup> in LC-MS/MS analyses in MM1.S, HEK293T, HuH7 and IMR32 cells. **b**, Comparison of biotinylated peptides from proteins known to interact with CRBN among HEK293T, HuH7 and IMR32 cells on a heat map. Source data are provided as a Source data file.

**a**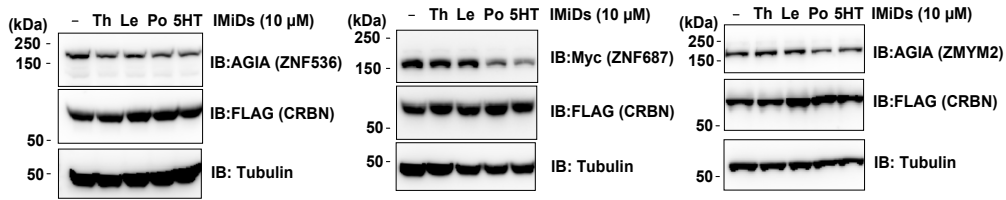**b**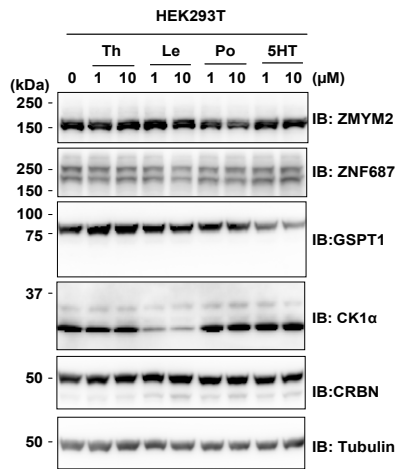**c**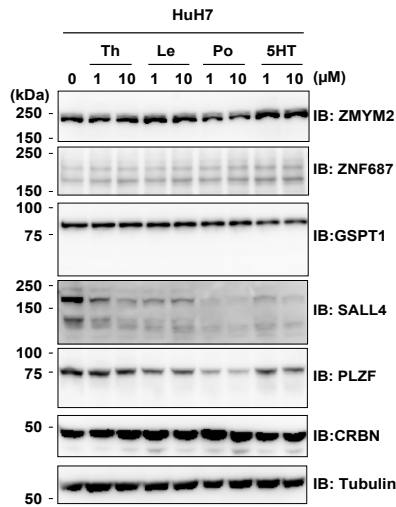

**Supplementary Fig. 8. Protein degradations of neo-substrate candidates identified by LC-MS/MS analysis and biotinylated peptide analyses.** **a**, Immunoblot analysis of thalidomide and its derivatives (IMiDs)-dependent protein degradation of ZNF536, ZNF687, and ZMYM2. HEK293T cells expressing AGIA-ZNF536, Myc-ZNF687 or ZMYM2-AGIA, and FLAG-CRBN were treated with DMSO, thalidomide (Th), lenalidomide (Le), pomalidomide (Po) or 5-hydroxythalidomide (5HT) for 16 h. The experiment was repeated three times independently with similar results. **b-c**, Immunoblot analysis of endogenous ZMYM2, ZNF687, GSPT1, CK1 $\alpha$ , GSPT1, SALL4 and PLZF protein levels in **(b)** HEK293T cells or **(c)** HuH7 cells treated with DMSO, thalidomide (Th), lenalidomide (Le), pomalidomide (Po) or 5-hydroxythalidomide (5HT) for 24 h. The experiment was repeated three times independently with similar results. Source data are provided as a Source data file.

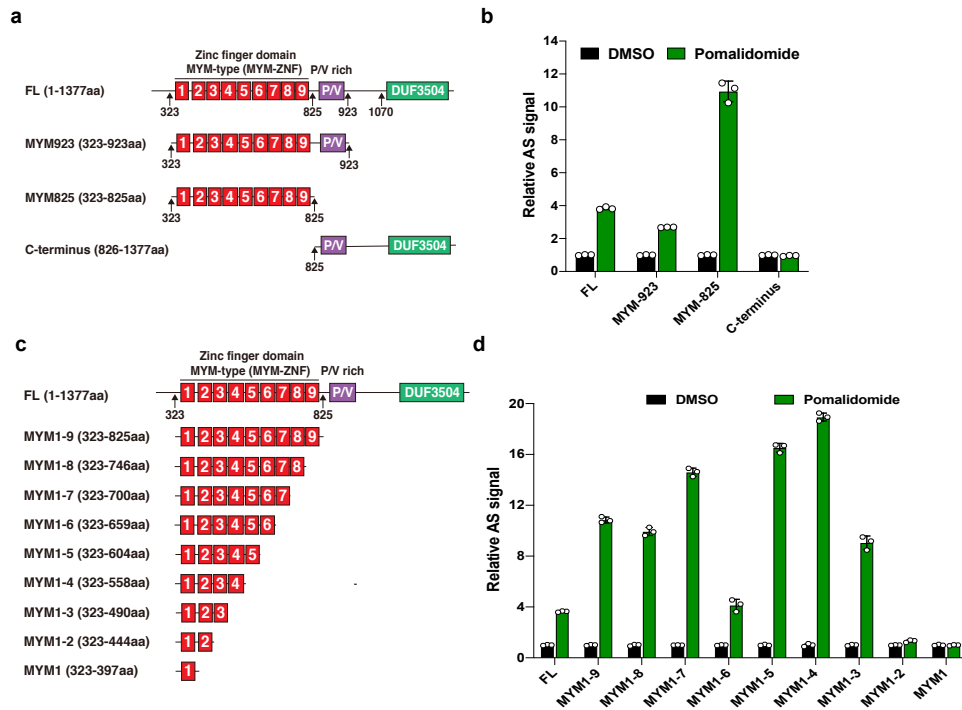

**Supplementary Fig. 9. Third MYM-ZNF is required for pomalidomide (Po)-dependent interaction between ZMYM2 and CRBN.** **a**, Schematic diagram of truncated ZMYM2 protein. FL; full-length. **b**, *In vitro* interaction assay between CRBN and truncated ZMYM2. The interaction between bls-CRBN and FLAG-GST-ZMYM2-FL, -MYM923, -MYM825 or -C-terminus in the presence of DMSO or 20  $\mu$ M Po was analysed using the AlphaScreen-based biochemical assay. Error bars denote the mean  $\pm$  standard deviation (independent experiments; n = 3). **c**, Schematic diagram of truncated MYM-ZNF of ZMYM2. **d**, *In vitro* interaction assay between CRBN and truncated MYM-ZNFs. The interaction between biotin-labeled bls-CRBN and FLAG-GST-ZMYM2-FL or -truncated MYM in the presence of DMSO or 20  $\mu$ M pomalidomide (Po) was analysed using the AlphaScreen-based biochemical assay. Error bars denote the mean  $\pm$  standard deviation (independent experiments; n = 3). **b**, **d**, All relative AlphaScreen (AS) signals are expressed as luminescence signals relative to that of DMSO. Source data are provided as a Source data file.

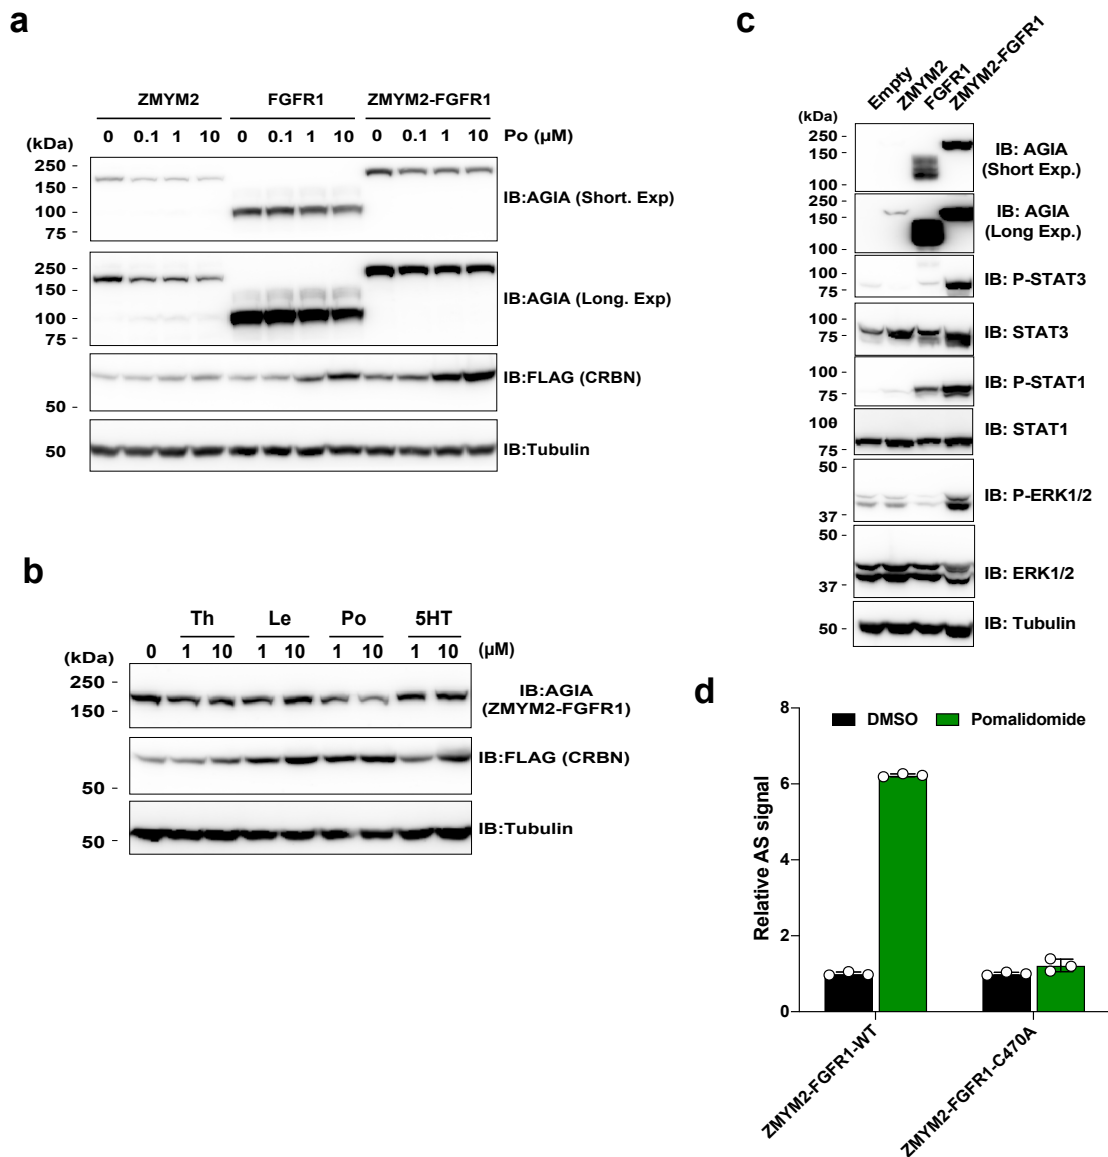

**Supplementary Fig. 10. ZMYM2-FGFR1 is a pomalidomide (Po) neo-substrate and activates the FGFR1 signalling pathway.** **a**, Immunoblot analysis of ZMYM2-, FGFR1- or ZMYM2-FGFR1-AGIA protein levels in HEK293T cells expressing ZMYM2-, FGFR1- or ZMYM2-FGFR1-AGIA and FLAG-CRBN treated with DMSO or pomalidomide (Po) for 16 h. The experiment was repeated three times independently with similar results. **b**, Thalidomide and its derivatives (IMiDs) specificity of protein degradation of ZMYM2-FGFR1-AGIA. The protein levels of ZMYM2-FGFR1 in HEK293T cells expressing ZMYM2-FGFR1-AGIA and FLAG-CRBN treated with DMSO, thalidomide (Th), lenalidomide (Le), pomalidomide (Po) or 5-hydroxythalidomide (5HT) for 16 h were analysed by immunoblotting. The experiment was repeated twice independently with similar results. **c**, Immunoblot analysis of phosphorylated proteins by ZMYM2-FGFR1 in HEK293T cells. Cell lysates of HEK293T cells stably expressing empty, AGIA-ZMYM2, -FGFR1 or ZMYM2-FGFR1 were analysed by immunoblot analysis. The experiment was repeated twice independently with similar results. **d**, *In vitro* interaction assay between CRBN and ZMYM2-FGFR1-WT or -C470A. The interaction between bls-CRBN and FLAG-GST-ZMYM2-FGFR1-WT or -C470A in the presence of DMSO or 20 μM pomalidomide (Po) was analysed using the AlphaScreen (AS)-based biochemical assay. Relative AS signals are expressed as luminescence signals relative to that of DMSO, and error bars denote the mean ± standard deviation (independent experiments; n = 3). Source data are provided as a Source data file.

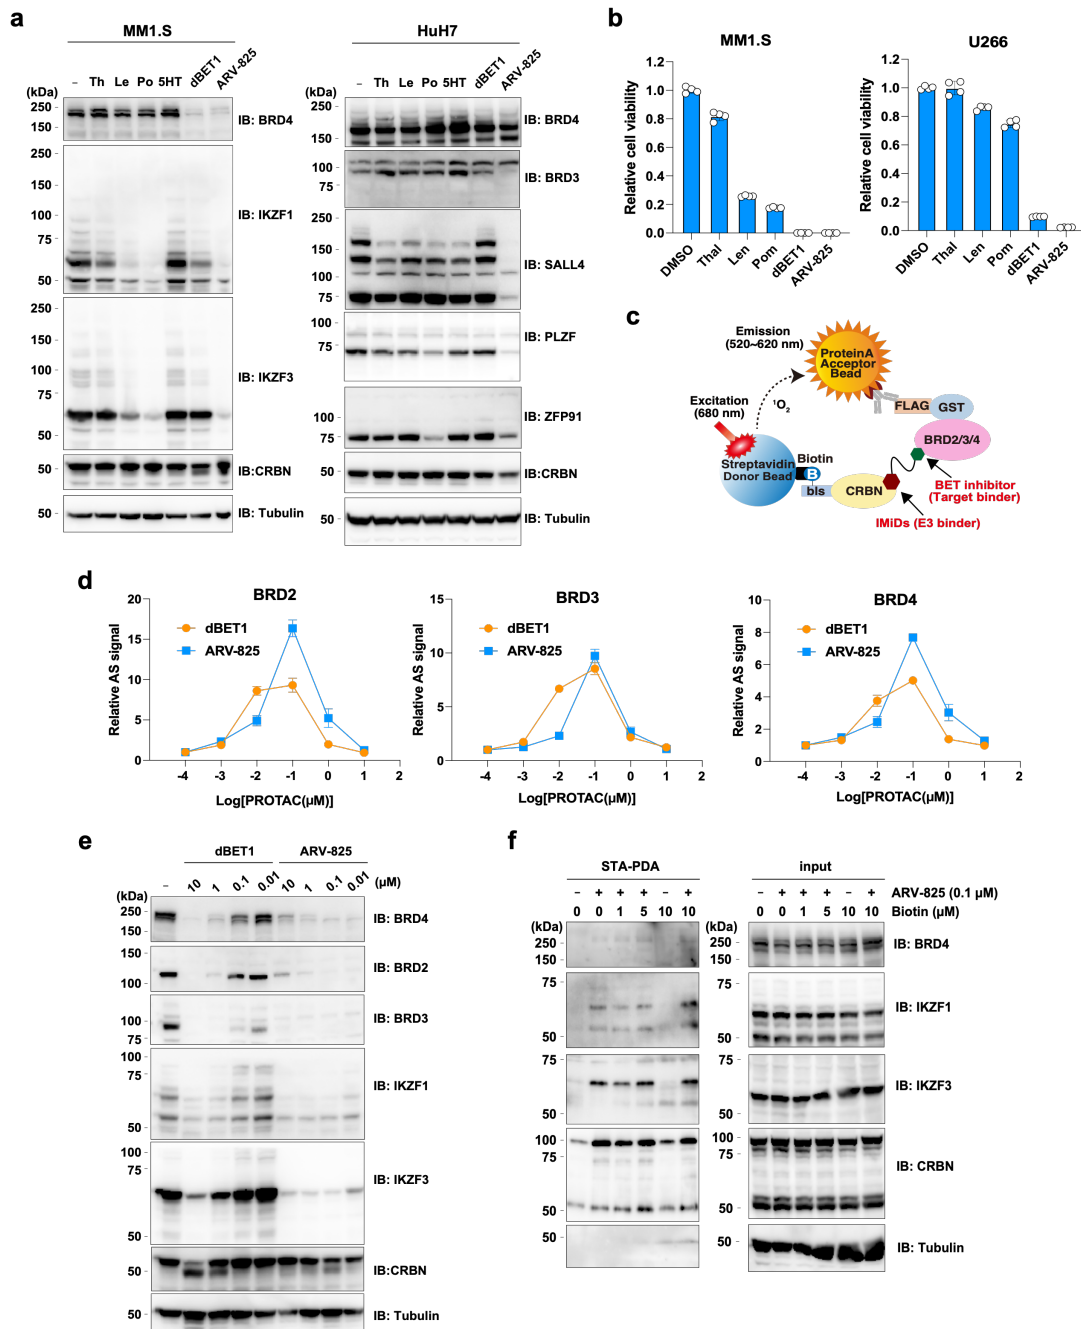

**Supplementary Fig. 11. Characterisation of proteolysis-targeting chimaeras (PROTACs) for BRD proteins *in vitro* and in cells.** **a**, Immunoblot analysis of endogenous thalidomide and its derivatives (IMiDs) neo-substrates and BRD family protein levels in MM1.S cells or HuH7 cells treated with DMSO, 20  $\mu\text{M}$  thalidomide (Th), 10  $\mu\text{M}$  lenalidomide (Le), 1  $\mu\text{M}$  pomalidomide (Po), 20  $\mu\text{M}$  5-hydroxythalidomide (5HT), 1  $\mu\text{M}$  dBET1 or 1  $\mu\text{M}$  ARV-825 for 24 h. The experiment was repeated twice independently with similar results. **b**, Cell viability assay of MM1.S cells and U266 cells treated with IMiDs or PROTACs. MM1.S cells and U266 cells were treated with DMSO, 10  $\mu\text{M}$  thalidomide (Thal), 1  $\mu\text{M}$  lenalidomide (Len), 0.1  $\mu\text{M}$  pomalidomide (Pom), 10  $\mu\text{M}$  dBET1 or 0.1  $\mu\text{M}$  ARV-825 for 6 d and cell viability was detected by Cell-Titer-Glo assay. All relative cell viabilities are expressed as luminescence signals relative to that of DMSO. Error bars denote the standard deviation (biological replicates;  $n = 4$ ). **c**, Schematic diagram of the AlphaScreen (AS)-based biochemical assay for detecting the PROTAC-dependent interaction between CRBN and BRD proteins. **d**, PROTAC dose-dependent *in vitro* interaction

assay between CRBN and BRD proteins. The interaction between bls-CRBN and FLAG-GST-BRD2, -BRD3, or -BRD4 in the presence of DMSO, dBET1 or ARV-825 (0.0001, 0.001, 0.01, 0.1, 1 or 10  $\mu$ M) was analysed using the AlphaScreen-based biochemical assay. All relative AlphaScreen (AS) signals are expressed as luminescence signals relative to that of DMSO. Error bars denote the standard deviation (independent experiments; n = 3). **e**, Immunoblot analysis of endogenous IMiD neo-substrates and BRD family protein levels in MM1.S cells treated with DMSO, dBET1 or ARV-825 for 24 h. The experiment was repeated twice independently with similar results. **f**, Biotin dose-dependent analysis of PROTAC-induced biotinylation of neo-substrates and BRD4 in MM1.S cells. MM1.S cells stably expressing AGIA-AirID-CRBN-WT were treated with DMSO or 0.1  $\mu$ M ARV-825, 0, 1, 5 or 10  $\mu$ M biotin and 5  $\mu$ M MG132 for 6 h. Then, the biotinylated proteins were pulled down using streptavidin beads and analysed by immunoblotting. The experiment was repeated twice independently with similar results. Source data are provided as a Source data file.
